# Supplementary material
Source: PubMed Central journal article supplement (PMC6461543)
Supplement: supp_7.2.E227_2018-0178-1-at.pdf [file supp_7.2.E227_2018-0178-1-at.pdf]

**Appendix 1 (as supplied by the authors):** Risk of self-inflicted injury and injury inflicted by others by maternal country of origin for the 20 countries contributing the most births to the cohort. Shown are crude relative risks (RR), comparing women from each country to non-immigrant women.

| Maternal Country of Origin    | Self-inflicted injury |                          |                   | Injury inflicted by others |                          |                   |
|-------------------------------|-----------------------|--------------------------|-------------------|----------------------------|--------------------------|-------------------|
|                               | No. with outcome      | Rate per 1000 deliveries | Crude RR (95% CI) | No. with outcome           | Rate per 1000 deliveries | Crude RR (95% CI) |
| Non-immigrant (N = 942,502)   | 240                   | 0.73                     | 1.00 (referent)   | 360                        | 1.10                     | 1.00 (referent)   |
| India (N = 45,032)            | 45                    | 1.00                     | 0.79 (0.58-1.06)  | 26                         | 0.58                     | 0.20 (0.13-0.30)  |
| China (N = 31,157)            | 9                     | 0.29                     | 0.23 (0.12-0.44)  | 21                         | 0.67                     | 0.23 (0.15-0.36)  |
| Pakistan (N = 26,130)         | 36                    | 1.38                     | 1.08 (0.78-1.51)  | 14                         | 0.54                     | 0.19 (0.11-0.31)  |
| Philippines (N = 21,653)      | 13                    | 0.60                     | 0.27 (0.47-0.82)  | 20                         | 0.92                     | 0.32 (0.21-0.50)  |
| Sri Lanka (N = 18,679)        | 17                    | 0.91                     | 0.72 (0.44-1.15)  | 13                         | 0.70                     | 0.24 (0.14-0.42)  |
| Jamaica (N = 11,265)          | 6                     | 0.53                     | 0.42 (0.19-0.93)  | 43                         | 3.82                     | 1.33 (0.98-1.79)  |
| Vietnam (N = 8,193)           | 10                    | 1.22                     | 0.96 (0.52-1.79)  | NR                         | -                        | -                 |
| Poland (N = 7,872)            | NR                    | -                        | -                 | 10                         | 1.27                     | 0.44 (0.24-0.82)  |
| Guyana (N = 6,467)            | 8                     | 1.24                     | 0.97 (0.49-1.95)  | 16                         | 2.47                     | 0.86 (0.53-1.41)  |
| Afghanistan (N = 6,176)       | 7                     | 1.13                     | 0.89 (0.42-1.87)  | 13                         | 2.10                     | 0.73 (0.42-1.26)  |
| Somalia (N = 5,660)           | NR                    | -                        | -                 | 20                         | 3.53                     | 1.23 (0.78-1.95)  |
| United States (N = 5,526)     | NR                    | -                        | -                 | 6                          | 1.09                     | 0.38 (0.17-0.84)  |
| Iran (N = 5,302)              | NR                    | -                        | -                 | NR                         | -                        | -                 |
| Iraq (N = 5,227)              | NR                    | -                        | -                 | 8                          | 1.53                     | 0.53 (0.27-1.07)  |
| Bangladesh (N = 5,082)        | 6                     | 1.18                     | 0.93 (0.42-2.07)  | 6                          | 1.18                     | 0.41 (0.18-0.91)  |
| UK and Colonies (N = 4,840)   | 9                     | 1.86                     | 1.46 (0.76-2.82)  | 14                         | 2.89                     | 0.43 (0.19-0.96)  |
| Romania (N = 4650)            | NR                    | -                        | -                 | NR                         | -                        | -                 |
| Lebanon (N = 4,564)           | NR                    | -                        | -                 | NR                         | -                        | -                 |
| Trinidad & Tobago (N = 3,719) | 7                     | 1.88                     | 1.48 (0.70-3.11)  | 11                         | 2.96                     | 1.03 (0.57-1.86)  |
| Yugoslavia (N = 3,585)        | 0                     | 0                        | 0                 | NR                         | -                        | -                 |
| Other (N = 96,500)            | 44                    | 0.46                     | 0.36 (0.27-0.48)  | 109                        | 1.13                     | 0.39 (0.32-0.48)  |

NR (Not reportable) due to cell sizes under 6.
