# Supplementary material
Source: PubMed Central journal article supplement (PMC6461543)
Supplement: supp_7.2.E227_2018-0178-original-submission.pdf [file supp_7.2.E227_2018-0178-original-submission.pdf]

Postpartum self-harm, suicide, assault and homicide in relation to immigrant status:  
a population-based study

**Authors:**

Simone N. Vigod, MD, MSc<sup>1,2,3</sup>, Serena Arora, BA<sup>1</sup>, Marcelo L. Urquia, PhD, MSc, MPH<sup>2,4</sup>, Cindy-  
Lee Dennis, PhD<sup>5,6</sup>, Kinwah Fung, MSc<sup>2</sup>, Sophie Grigoriadis, MD, PhD<sup>3,7</sup>, Joel G. Ray, MD, MSc<sup>3,5,8</sup>

**Institutions:**

1. Women's College Hospital and Research Institute, Toronto, Ontario, Canada
2. Institute for Clinical Evaluative Sciences, Toronto, Ontario, Canada
3. Department of Psychiatry, University of Toronto, Toronto, Ontario, Canada
4. Department of Community Health Sciences, Rady Faculty of Health Sciences, University of Manitoba, Winnipeg, Manitoba, Canada
5. Li Ka Shing Knowledge Institute, St. Michael's Hospital, Toronto, Ontario, Canada
6. Faculty of Nursing, University of Toronto, Toronto, Ontario, Canada
7. Department of Psychiatry, Sunnybrook Health Sciences Centre
8. Department of Medicine, University of Toronto, Toronto, Ontario, Canada

**Word count (text):** 2500

**Corresponding author:**

Simone Vigod, MD, MSc, FRCPC  
Women's College Hospital  
76 Grenville street Rm. 7234  
Toronto, ON M5S 1B2  
[simone.vigod@wchospital.ca](mailto:simone.vigod@wchospital.ca)

**Funding Statement:** This study received support from the Institute for Clinical Evaluative Sciences (ICES), which is funded by an annual grant from the Ontario Ministry of Health and Long-Term Care (MOHLTC). The opinions, results, and conclusions reported in this paper are those of the authors and are independent from the funding sources. No endorsement by ICES or the Ontario MOHLTC is intended or should be inferred. Parts of this material are based on data and information compiled and provided by Canadian Institutes for Health Research (CIHI). However, the analyses, conclusions, opinions, and statements expressed herein are those of the author and not necessarily those of CIHI.

**Disclosures:** Dr. Vigod is supported by a New Investigator Award from the Canadian Institutes for Health Research, and the Shirley A. Brown Memorial Chair in Women's Mental Health Research at Women's College Hospital in Toronto, Ontario. Dr. Urquia holds a Canada Research Chair in Applied Population Health.

**Abstract (250 words)**

**Background:** Intentional injuries such as suicide and assault are leading causes of maternal morbidity and mortality. Whether immigrant women have a different risk, warranting intervention, is unknown.

**Methods:** This cohort study used population-based administrative data in Ontario, Canada, 2002-2012. The risk of self-inflicted injury (self-harm or suicide), and injury inflicted by others (assault or homicide), were each analyzed within 1 year postpartum, comparing 327,279 immigrant vs. 942,502 non-immigrant mothers. Relative risks (RR) were adjusted for maternal age, parity, income, resource utilization and psychiatric history.

**Results:** Self-inflicted injury was lower among immigrants (0.73/1000 births) than non-immigrants (1.27/1000 births; RR 0.58 (95%CI 0.50-0.67) but the difference was attenuated after covariate adjustment, aRR 0.91 (95%CI 0.78-1.04). Risk of injury inflicted by others was lower among immigrants (aRR 0.57, 95%CI 0.51-0.64). Within immigrants, there were no differences in risk for self-injury by duration of residence or refugee status; injury inflicted by others was higher in refugees than non-refugees (aRR 1.79, 95%CI 1.33-2.41), and among long-term (aRR 2.27, 95%CI 1.76-2.91) and medium-term (aRR 1.58, 95%CI 1.19-2.11) vs. recent immigrants. Compared to immigrants from India, risk for self-injury was lower among women from China (0.61) and Jamaica (0.37). For injury inflicted by others, risk was higher for women from Somalia (2.92), Guyana (3.35), Trinidad & Tobago (3.84) and Jamaica (4.00).

**Interpretation:** Immigrant mothers are at overall lower risk of intentional injury than their Canadian-born counterparts. Variability in risk between immigrant groups highlights risk and resilience factors, and supports need for cultural competency in perinatal care provision.

## Introduction

Intentional injury is a leading cause of morbidity and mortality for postpartum women, with potential for devastating consequences for women, children and families (1). Suicidal thoughts are common postnatally, affecting as many as 9% of women (2), and suicide accounts for a high proportion of maternal deaths globally (1, 3, 4). Assault, mainly by intimate partners, affects about 14% of women perinatally (5), and also influences maternal mortality (6-9).

Immigrant women contribute about one-quarter to one-third of births in high income countries (12), but their risk for intentional injury in the postnatal period is unknown. The selective nature of the immigration process can result in an over-representation of relatively young, healthy, educated and economically active persons – the so-called “healthy immigrant effect”(13-15). Yet, some immigrant women exhibit up to three times the rate of postpartum depression of their non-immigrant counterparts, a risk factor for suicidal thoughts and actions (16-18). Outside the perinatal period, women from certain immigrant groups are at higher risk for intimate partner violence and homicide, relative to non-immigrants (19, 20). Given the large number of births to immigrant women in many countries, specific knowledge about if, and how, immigration status is a risk factor for postpartum intentional injury may be important to the design and delivery of policies and interventions to prevent this serious outcome.

This study compared the risk of self-inflicted injury (self-harm or suicide) and injury inflicted by others (assault or homicide) between immigrant and non-immigrant women in a large population-based Canadian sample. Risk was also evaluated, among immigrants, by immigration characteristics of refugee status, duration of residence and country of origin.

## Methods

**Study Design.** This population-based cohort study was completed in Ontario, Canada's most populous province of about 13.5 million people. Included were all Ontarian women who had a live birth between April 1st, 2002 and March 31st, 2012. Outcomes were assessed up to 1 year from the index birth. Research ethics board approval was from Sunnybrook Health Sciences Centre in Toronto, Ontario (# 2016 0904 337 000).

**Data Sources.** De-identified and linked sociodemographic and health administrative databases were accessed through the Institute for Clinical and Evaluative Sciences (ICES) in Toronto, Ontario ([www.ices.on.ca](http://www.ices.on.ca)). The MOMBABY dataset, derived from the Canadian Institutes for Health Information Discharge Abstract Database (CIHI-DAD), was used to identify all women with a hospital delivery, reflecting more than 98% of all births (21). The Ontario segment of the Immigration, Refugees and Citizenship Canada (IRCC) database contains detailed information for immigrants to the province from 1985 onward, including their refugee status, date of immigration and country of origin. Immigrants to Canada prior to 1985 are not classified as such, nor are those who immigrated to another Province before moving to Ontario. The National Ambulatory Care Reporting System (NACRS) contains diagnostic information for all emergency department visits, including for intentional injuries, and the Ontario Vital Statistics Database (OVSD) records cause of death. The Registered Persons Database (RPDB) includes information about sex, age and postal code for all Ontario residents. The Ontario Health Insurance Plan (OHIP) contains physician billings, including diagnostic and procedures codes. The Ontario Mental Health Reporting System (OMHRS) contains psychiatric hospitalization data. These linked datasets contain complete and reliable data, with excellent validity for primary diagnostic information in emergency and inpatient health encounters (22-24).

1  
2 **Participants.** We considered all Ontario women aged 10-50 with a liveborn infant during  
3  
4 the study period. Women entered the cohort at each birth, unless a birth was within one year  
5  
6 of a previous one. Excluded were women without a valid health card number.  
7  
8

9 For the main exposure status, women were classified as immigrant or non-immigrant,  
10  
11 based on their inclusion in the Ontario segment of the IRCC dataset. For additional analyses,  
12  
13 immigrant women were further classified as refugee or non-refugees, by duration of residence  
14  
15 in Canada at the time of in the index birth (10+ years, 5-9 years or under 5 years), and by  
16  
17 country of origin.  
18  
19

20  
21 **Outcomes.** There were two main study outcomes assessed within 365 days after the  
22  
23 index birth: The first was self-inflicted injury, a composite that included any form of self-harm  
24  
25 or death by suicide. The second was injury inflicted by others, a composite that included  
26  
27 maternal assault or death. The NACRS dataset was used to identify ICD-10 codes for self-harm  
28  
29 with deliberate (X60-X84) and undetermined (Y10-Y19, Y28) intent. The latter codes were  
30  
31 included because they are strongly associated with future deliberate self-harm (25). Injury  
32  
33 inflicted by others used ICD-10 assault codes X92-Y09 and Y87.1. Deaths by suicide were  
34  
35 identified in the OVSD; homicides were defined as a death from external injury in the OVSD  
36  
37 where there was also a documented assault in the NACRS dataset (26).  
38  
39  
40  
41  
42

43 **Covariates.** Covariates included maternal age, parity and neighbourhood income level –  
44  
45 each at the index birth. In the two years prior to the index birth, we assessed for maternal  
46  
47 psychiatric diagnoses (i.e. psychotic disorders, mood disorders, substance and alcohol use  
48  
49 disorders) and maternal medical morbidity, summarized using health care Resource Utilization  
50  
51 Bands, where categories 4 and 5 represent high and very high-care needs patients as per the  
52  
53 Johns Hopkins Adjusted Clinical Groups Case-Mix System (27).  
54  
55  
56  
57  
58  
59  
60

1  
2 **Statistical Analyses.** We compared the risk for each of the two main study outcomes  
3  
4 between immigrant vs. non-immigrant women, using modified Poisson regression with robust  
5  
6 error variance, to account for potential clustering of more than one birth within an individual  
7  
8 woman. Relative risks (RR) and 95% confidence intervals (CI) were generated. Models were  
9  
10 adjusted for variables chosen, *a priori*, to be important potential confounders: maternal age,  
11  
12 parity, residential income quintile, medical morbidity (defined by resource utilization band  
13  
14 quintile), and prior maternal psychiatric diagnosis.  
15  
16  
17

18  
19 Further analyses were restricted to immigrant women. Therein, the risk for the two  
20  
21 main study outcomes were assessed by refugee vs. non-refugee status, duration of residence in  
22  
23 Canada at the time of in the index birth (10+ years, 5-9 years or under 5 years), and by country  
24  
25 of origin. For maternal country of origin, the top-20 immigrant countries contributing the most  
26  
27 births in Ontario were chosen, with women from India serving as the reference group, since  
28  
29 they are the most numerous. In the immigrant analyses, RRs were adjusted for age, parity and  
30  
31 other immigration characteristics.  
32  
33  
34  
35

36 Because of small sample sizes, modified Poisson regression models did not always  
37  
38 converge. In that situation, Cox proportional hazard models were used, and generated hazard  
39  
40 ratios were reported as HRs with 95% CIs. Due to counts less than six, the individual elements  
41  
42 of the main study outcomes could not be presented.  
43  
44  
45

46 All analyses were conducted using SAS 9.3 for Unix (SAS version 9.3, SAS Institute Inc.,  
47  
48 Cary, NC, USA). Cell sizes < 6 were not reportable due to Ontario privacy regulations.  
49  
50  
51  
52  
53  
54  
55  
56  
57  
58  
59  
60

## Results

There were 1,269,781 births among 327,279 immigrants and 942,502 non-immigrants. Among the immigrant women, 41,500 (13%) were refugees, and close to half (N=147,286; 45.0%) had lived in Canada less than 5 years. Immigrant women were most frequently from India (N = 45,032), China (N = 31,157), Pakistan (N = 26,130) and the Philippines (N = 21,653) (Table S1). Immigrant women were similar in age to non-immigrants, but more likely to be multiparous and to reside in a low income neighbourhood (Table 1). Immigrant women had slightly higher rates of diabetes and general medical morbidity, but lower rates of maternal psychiatric diagnoses in the preceding 2 years. Clinically, perinatal outcomes appeared not to differ substantively by immigrant status.

In the 1-year period after the index birth, there were 4424 births affected by intentional injury inflicted either by self or others -- a rate of 3.48 per 1000 births. There were 1,411 non-fatal self-inflicted injury events (1.11 per 1000 births), 3061 non-fatal injuries inflicted by others (2.41 per 1000), and 44 deaths due to injury following self-inflicted injury or an injury inflicted by others (0.03 per 1000 births).

Immigrants had a lower rate of fatal or non-fatal self-inflicted injury (0.73 per 1000) than non-immigrants (1.27 per 1000) -- a crude RR of 0.58 (95% CI 0.50 to 0.60) (Table 2). The relation was attenuated after adjusting for other covariates in the multivariable model (aRR 0.91, 95% CI 0.78-1.04), with the attenuation especially driven by the higher number of prior psychiatric disorder diagnoses among non-immigrant women (Table 2). Immigrants also had a lower associated risk of injury inflicted by others (1.10 per 1000 deliveries) than non-immigrants (2.28 per 1000) – a crude RR of 0.38 (95% CI 0.34 to 0.43) and an aRR of 0.57 (95% CI 0.51 to 0.64) (Table 2).

1  
2  
3  
4  
5  
6  
7  
8  
9  
10  
11  
12  
13  
14  
15  
16  
17  
18  
19  
20  
21  
22  
23  
24  
25  
26  
27  
28  
29  
30  
31  
32  
33  
34  
35  
36  
37  
38  
39  
40  
41  
42  
43  
44  
45  
46  
47  
48  
49  
50  
51  
52  
53  
54  
55  
56  
57  
58  
59  
60

Upon restricting to immigrant women, the RRs for self-inflicted injury were similar by duration of residence in Canada and by refugee status (Figure 1). Self-inflicted injury was notably less common among immigrant women from China, Jamaica and the Former Republic of Yugoslavia, compared to immigrant women from India, the largest immigrant group by population size (Figure 2a, Table S1).

The risk for injury inflicted by others increased with longer duration of residence in Canada (Figure 1). For example, the corresponding rate among immigrant women living in Canada 10+ years was 1.67 per 1000 births, compared to a rate of 0.77 per 1000 in immigrant women living in Canada less than 5 years (Figure 1). Refugees (2.07 per 1000) also had a higher associated risk than non-refugee immigrants (0.96 per 1000) (Figure 1). Women from Trinidad and Tobago, Guyana, Jamaica and Somalia were specifically at the highest risk for injury inflicted by others (Figure 2b, Table S1).

### Interpretation

Intentional injury in the first year after pregnancy was observed among almost 1 in every 250 births in Canada. Immigrants had a similar risk for self-inflicted injury compared to non-immigrants, after considering differences in pre-existing psychiatric morbidity, suggesting an absence of a healthy immigrant effect for this outcome. While injury inflicted by others was less likely to occur among immigrant women, certain subgroups were at higher risk than others, with rates closer to that of Canadian-born women.



## *Context*

The self-inflicted injury rate for the overall cohort herein is similar to postpartum self-injury rates reported previously in Canada and other high-income countries such as the U.S. and the U.K. (4, 11, 28). Non-postpartum immigrant women are at lower risk for suicidality than non-immigrants (18). Yet, immigrant women are at overall higher risk for postpartum depression, itself a risk factor for suicidality, so the fact that our results do not align with data collected outside the perinatal period is not surprising (17, 29, 30). Aligned with the current study findings, prior Canadian population-level data showed the risk for postpartum psychiatric hospitalization to be similar between immigrants and non-immigrants (31).

The rate of injury inflicted by others in our overall cohort is lower than in reports mainly originating from the U.S., where homicide rates are higher than in Canada (9, 32)(33). Herein, the observed lower risk among immigrants vs. non-immigrants counters prior European data showing a higher homicide rate among female migrants (19, 20)(34). Prior studies were not restricted to events arising postpartum, however, and did not include non-fatal assault. The current findings are consistent with studies observing a higher risk of sexual assault among mothers who are refugees and asylum seekers, than non-refugee immigrant mothers (35).

## *Mechanisms*

Immigrant women in our cohort were of lower income and more likely to be multiparous than non-immigrants, both of which conferred increased risk for suicidality. However, they were at lower risk for suicidality than non-immigrants, a difference nullified after considering that non-immigrant women were much more likely to have a prior maternal

1  
2 psychiatric diagnosis, the strongest risk factor for postpartum mental illness (36, 37). This  
3  
4 suggests that immigrant women may enter the postpartum period with a lower burden of  
5  
6 diagnosed mental illness, but immigrant status is not protective against developing postpartum  
7  
8 suicidality. Symptoms of mental illness may present differently in women from different  
9  
10 cultures than for non-immigrants. For example, women from some Asian countries may present  
11  
12 with somatic symptoms such as non-specific pain or discomfort as an initial sign (38), so mental  
13  
14 illness can be missed. Awareness of cultural differences can help rapidly identify emerging  
15  
16 mental illness, and ensure women are screened for any ensuing suicidality.  
17  
18  
19  
20  
21

22           Given that some immigrant mothers experience greater poverty (16), we might also  
23  
24 have expected to observed a heightened risk for assault or homicide. However, consistent with  
25  
26 results from a Canadian self-report survey where intimate partner violence rates were half that  
27  
28 among immigrant vs. non-immigrant mothers (39), this was not the case. Among women from  
29  
30 countries most highly represented herein, including India and Pakistan, the risk for injury  
31  
32 inflicted by others was relatively low, driving the overall lower risk. Women from these  
33  
34 countries have established social support structures, and practice traditional postpartum rituals  
35  
36 that include high levels of woman-to-woman support (40). These factors have been shown to  
37  
38 decrease risk for mental health problems (41), so that may also be protective against escalating  
39  
40 violence in the home or elsewhere. Some immigrant women were at higher risk than others,  
41  
42 however, with rates that approached those of non-immigrant women. The higher risk with  
43  
44 longer duration of residence in Canada would align with the “healthy immigrant effect”,  
45  
46 wherein individuals are most healthy nearer to the time of their arrival, and then take on the  
47  
48 tendencies of their host country over time, partly in response to the stress of acculturation and  
49  
50  
51  
52  
53  
54  
55  
56  
57  
58  
59  
60

1 norms of the new country (14). The higher risk for refugee women and for those from various  
2 countries of origin may be multifactorial. Refugees often face additional pre- and post-  
3 migratory stressors, including gender-based violence, post-traumatic stress disorder, forced  
4 migration and separation from their children (29, 42). Many refugees originate from world  
5 regions with high rates of perinatal intimate partner violence, including areas of Africa and the  
6 Caribbean (43-45). Also, qualitative research suggests that Caribbean women, in particular,  
7 report negative experiences with the healthcare system, which may result in their reluctance to  
8 access and engage with treatment and support services intimate partner violence (46, 47).

### 21 *Strengths and limitations*

22 Strengths of this study include its use of population-level data, within a universal  
23 healthcare system, and the capture of serious health outcomes at the individual level. However,  
24 administrative health data can only capture those injuries severe enough to warrant  
25 declaration, such as an emergency department encounter. Intentional injury may have been  
26 selectively under-identified in immigrant women: social stigma, language barriers, fear of  
27 deportation or reprisal, or the presence of a male at a health visit might discourage an  
28 immigrant woman from disclosing that a specific injury was intentional (48, 49). Health care  
29 providers with minimal knowledge of a woman's cultural norms may under-identify intentional  
30 injury, in some cases (50).

31 This study expands knowledge about postpartum risk factors for self-harm, and harm  
32 perpetrated by others, among immigrant women. The apparent protective effect among some  
33 immigrant groups might highlight how their traditional postpartum structures might be  
34 generalized to others, including non-immigrant women. The vulnerability of refugee immigrant

1  
2 women and those from specific countries to harm perpetrated by others supports the rationale  
3  
4 for intervention to improve outcomes, including by enhancing the cultural competence of  
5  
6 health care providers who care for women in pregnancy and in the months thereafter.  
7  
8  
9  
10  
11  
12  
13  
14  
15  
16  
17  
18  
19  
20  
21  
22  
23  
24  
25  
26  
27  
28  
29  
30  
31  
32  
33  
34  
35  
36  
37  
38  
39  
40  
41  
42  
43  
44  
45  
46  
47  
48  
49  
50  
51  
52  
53  
54  
55  
56  
57  
58  
59  
60

Confidential

**Table 1. Baseline characteristics of immigrant and non-immigrant women who gave birth in Ontario during the study period.** Data are presented as a number (%) unless otherwise indicated.

| Characteristic                                                       | Immigrants<br>(N = 327,279) | Non-immigrants<br>(N = 942,502) |
|----------------------------------------------------------------------|-----------------------------|---------------------------------|
| <b>Demographic</b>                                                   |                             |                                 |
| Mean (SD) age, years                                                 | 30.5 (5.2)                  | 29.7 (5.6)                      |
| Primiparous                                                          | 141,131 (43.1)              | 435,940 (46.3)                  |
| Lowest neighbourhood income quintile                                 | 112,624 (34.4)              | 175,588 (18.6)                  |
| <b>Maternal morbidity within 2 years prior to the index birth</b>    |                             |                                 |
| Diabetes mellitus prior to or in pregnancy                           | 6,445 (2.0)                 | 16,057 (1.7)                    |
| Hypertension prior to or in pregnancy                                | 6,276 (1.9)                 | 26,657 (2.8)                    |
| Health Utilizations Bands 4 and 5 (highest)                          | 233,840 (71.4)              | 638,345 (67.7)                  |
| <b>Psychiatric morbidity within 2 years prior to the index birth</b> |                             |                                 |
| Mood disorder                                                        | 7,372 (2.3)                 | 46,849 (5.0)                    |
| Psychotic disorder                                                   | 680 (0.2)                   | 2,929 (0.3)                     |
| Substance or alcohol use disorder                                    | 1,613 (0.5)                 | 24,966 (2.6)                    |
| Primary care physician visit                                         | 75,978 (23.2)               | 271,515 (28.8)                  |
| Psychiatrist visit                                                   | 5,518 (1.7)                 | 34,413 (3.7)                    |
| Psychiatric hospitalization                                          | 532 (0.2)                   | 4,358 (0.5)                     |
| Deliberate self-harm                                                 | 2,588 (0.8)                 | 20,396 (2.2)                    |
| <b>Obstetrical and perinatal indicators at the index birth</b>       |                             |                                 |
| Preterm birth < 37 weeks' gestation                                  | 21,594 (6.6)                | 68,637 (7.3)                    |
| Mean (SD) birthweight, grams                                         | 3,282 (557)                 | 3,410 (584)                     |
| Cesarean delivery                                                    | 92,094 (28.1)               | 258,841 (27.5)                  |
| Neonatal morbidity:                                                  |                             |                                 |
| <i>Respiratory distress syndrome</i>                                 | 3,724 (1.1)                 | 14,216 (1.5)                    |
| <i>Seizure</i>                                                       | 949 (0.3)                   | 3,583 (0.4)                     |
| <i>Sepsis</i>                                                        | 4,144 (1.3)                 | 14,094 (1.5)                    |
| <i>Intraventricular hemorrhage</i>                                   | 1,745 (0.5)                 | 5,490 (0.6)                     |
| <i>Persistent fetal circulation</i>                                  | 893 (0.3)                   | 3,172 (0.3)                     |
| <i>Congenital/neonatal infection</i>                                 | 1,219 (0.4)                 | 1,219 (0.4)                     |
| <i>Neonatal intensive care unit admission</i>                        | 45,976 (14.0)               | 121,434 (12.9)                  |
| <b>Infant mortality &lt; 365 days of the index birth</b>             | 1,227 (3.8 per 1000)        | 3,276 (3.5 per 1000)            |

**Table 2. Risk of self-inflicted injury (self-harm or suicide), and injury inflicted by others (assault or homicide), comparing 327,279 immigrant women vs. 942,502 non-immigrant women who gave birth in Ontario Canada, 2002-2012.** Relative risks are adjusted for maternal age, parity, income quintile, resource utilization band and prior maternal psychiatric diagnosis.

| Variable modeled                     | Self-inflicted injury                       |                              |                                 | Injury inflicted by others                  |                              |                                 |
|--------------------------------------|---------------------------------------------|------------------------------|---------------------------------|---------------------------------------------|------------------------------|---------------------------------|
|                                      | No. with the outcome (rate per 1000 births) | Crude relative risk (95% CI) | Adjusted relative risk (95% CI) | No. with the outcome (rate per 1000 births) | Crude relative risk (95% CI) | Adjusted relative risk (95% CI) |
| <b>Non-immigrant status</b>          | 1199 (1.27)                                 | 1.00 (referent)              | 1.00 (referent)                 | 2710 (2.88)                                 | 1.00 (referent)              | 1.00 (referent)                 |
| <b>Immigrant status</b>              | 240 (0.73)                                  | 0.58 (0.50-0.67)             | 0.91 (0.78-1.04)                | 360 (1.10)                                  | 0.38 (0.34-0.43)             | 0.57 (0.51-0.64)                |
| Maternal age, years                  |                                             |                              | 0.86 (0.85-0.87)                |                                             |                              | 0.81 (0.80-0.81)                |
| Number of previous births            |                                             |                              | 1.44 (1.39-1.51)                |                                             |                              | 1.64 (1.59-1.68)                |
| Maternal income quintile (Q)         |                                             |                              |                                 |                                             |                              |                                 |
| Q1, 2 or 3 (lower)                   |                                             |                              | 1.00 (referent)                 |                                             |                              | 1.00 (referent)                 |
| Q4 or 5 (higher)                     |                                             |                              | 0.86 (0.76-0.98)                |                                             |                              | 0.61 (0.56-0.68)                |
| Resource Utilization Band (RUB)      |                                             |                              |                                 |                                             |                              |                                 |
| RUB 1, 2 or 3 (lower)                |                                             |                              | 1.00 (referent)                 |                                             |                              | 1.00 (referent)                 |
| RUB 4 or 5 (higher)                  |                                             |                              | 0.88 (0.79-0.98)                |                                             |                              | 1.04 (0.96-1.12)                |
| Prior maternal psychiatric diagnosis |                                             |                              |                                 |                                             |                              |                                 |
| No                                   |                                             |                              | 1.00 (referent)                 |                                             |                              | 1.00 (referent)                 |
| Yes                                  |                                             |                              | 7.01 (6.25-7.86)                |                                             |                              | 3.55 (3.26-3.86)                |

1  
2  
3  
4  
5  
6  
7  
8  
9  
10  
11  
12  
13  
14  
15  
16  
17  
18  
19  
20  
21  
22  
23  
24  
25  
26  
27  
28  
29  
30  
31  
32  
33  
34  
35  
36  
37  
38  
39  
40  
41  
42  
43  
44  
45  
46  
47  
48  
49  
50  
51  
52  
53  
54  
55  
56  
57  
58  
59  
60

**Figure 1. Risk of self-inflicted injury (self-harm or suicide) and injury inflicted by others (assault or homicide), by duration of residence and by refugee status, restricted to immigrants to Canada. Relative risks are adjusted for maternal age and parity.**

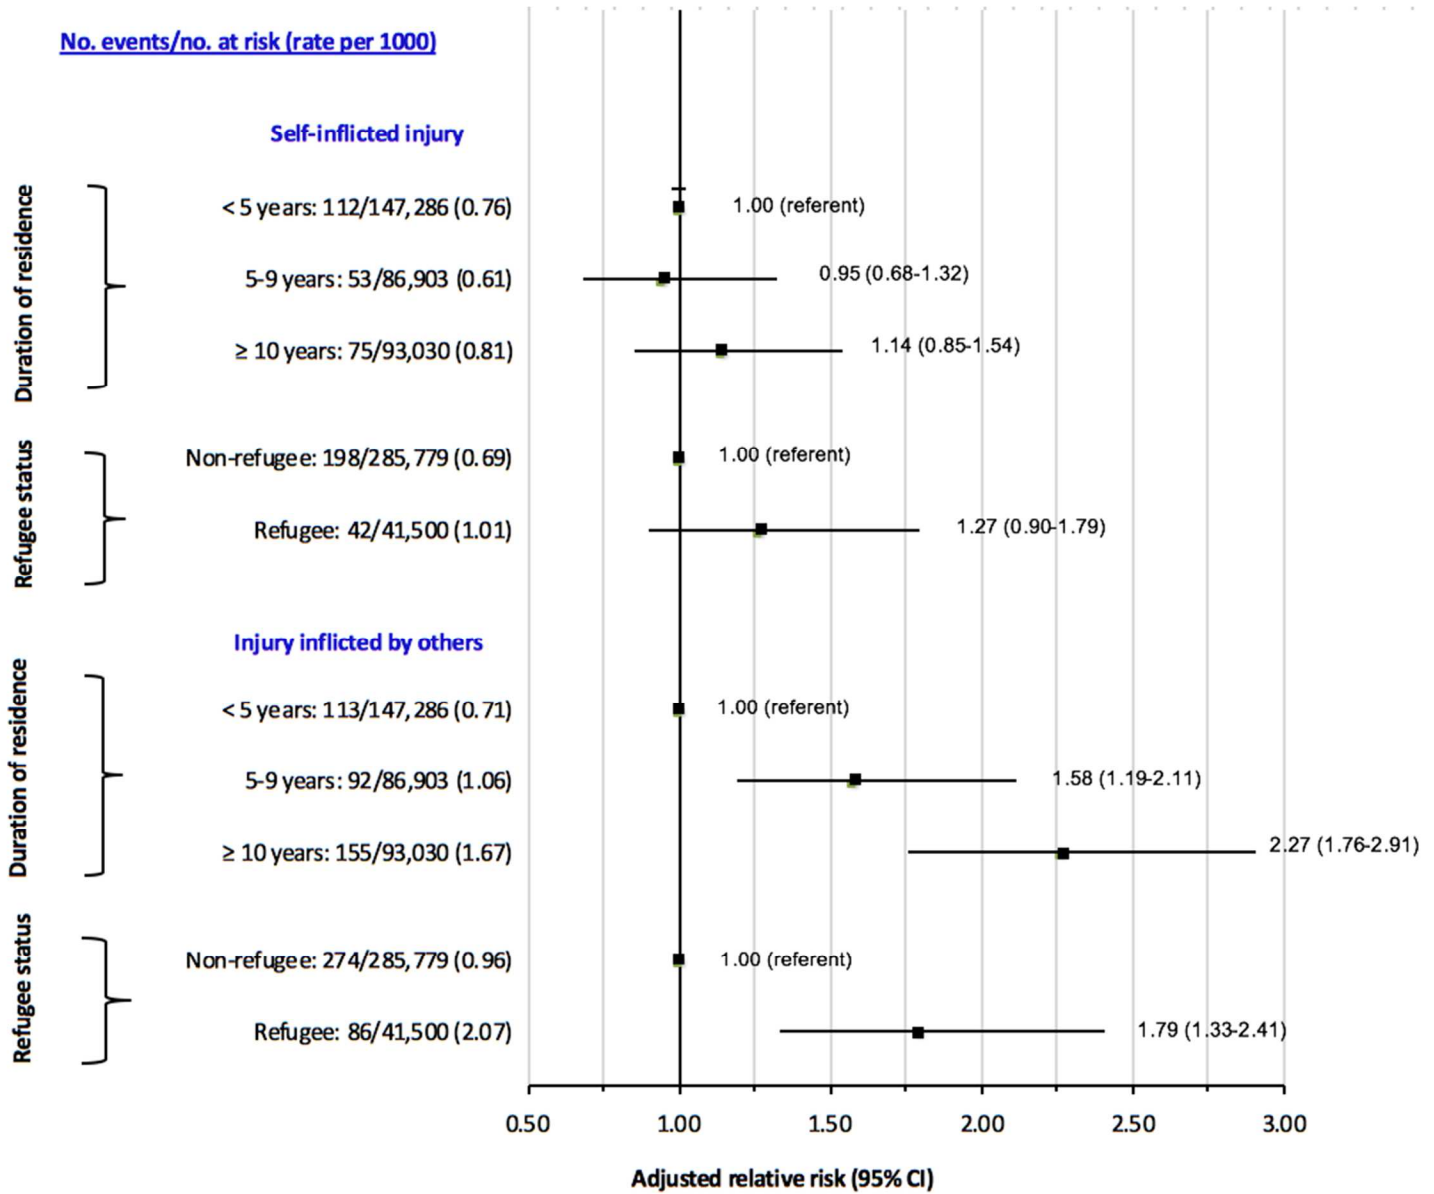

**Figure 2a. Risk of self-inflicted injury (self-harm or suicide) among immigrant women, comparing those from 19 different countries to women from India.** Hazard ratios are adjusted for maternal age, parity, duration of residence and refugee status.

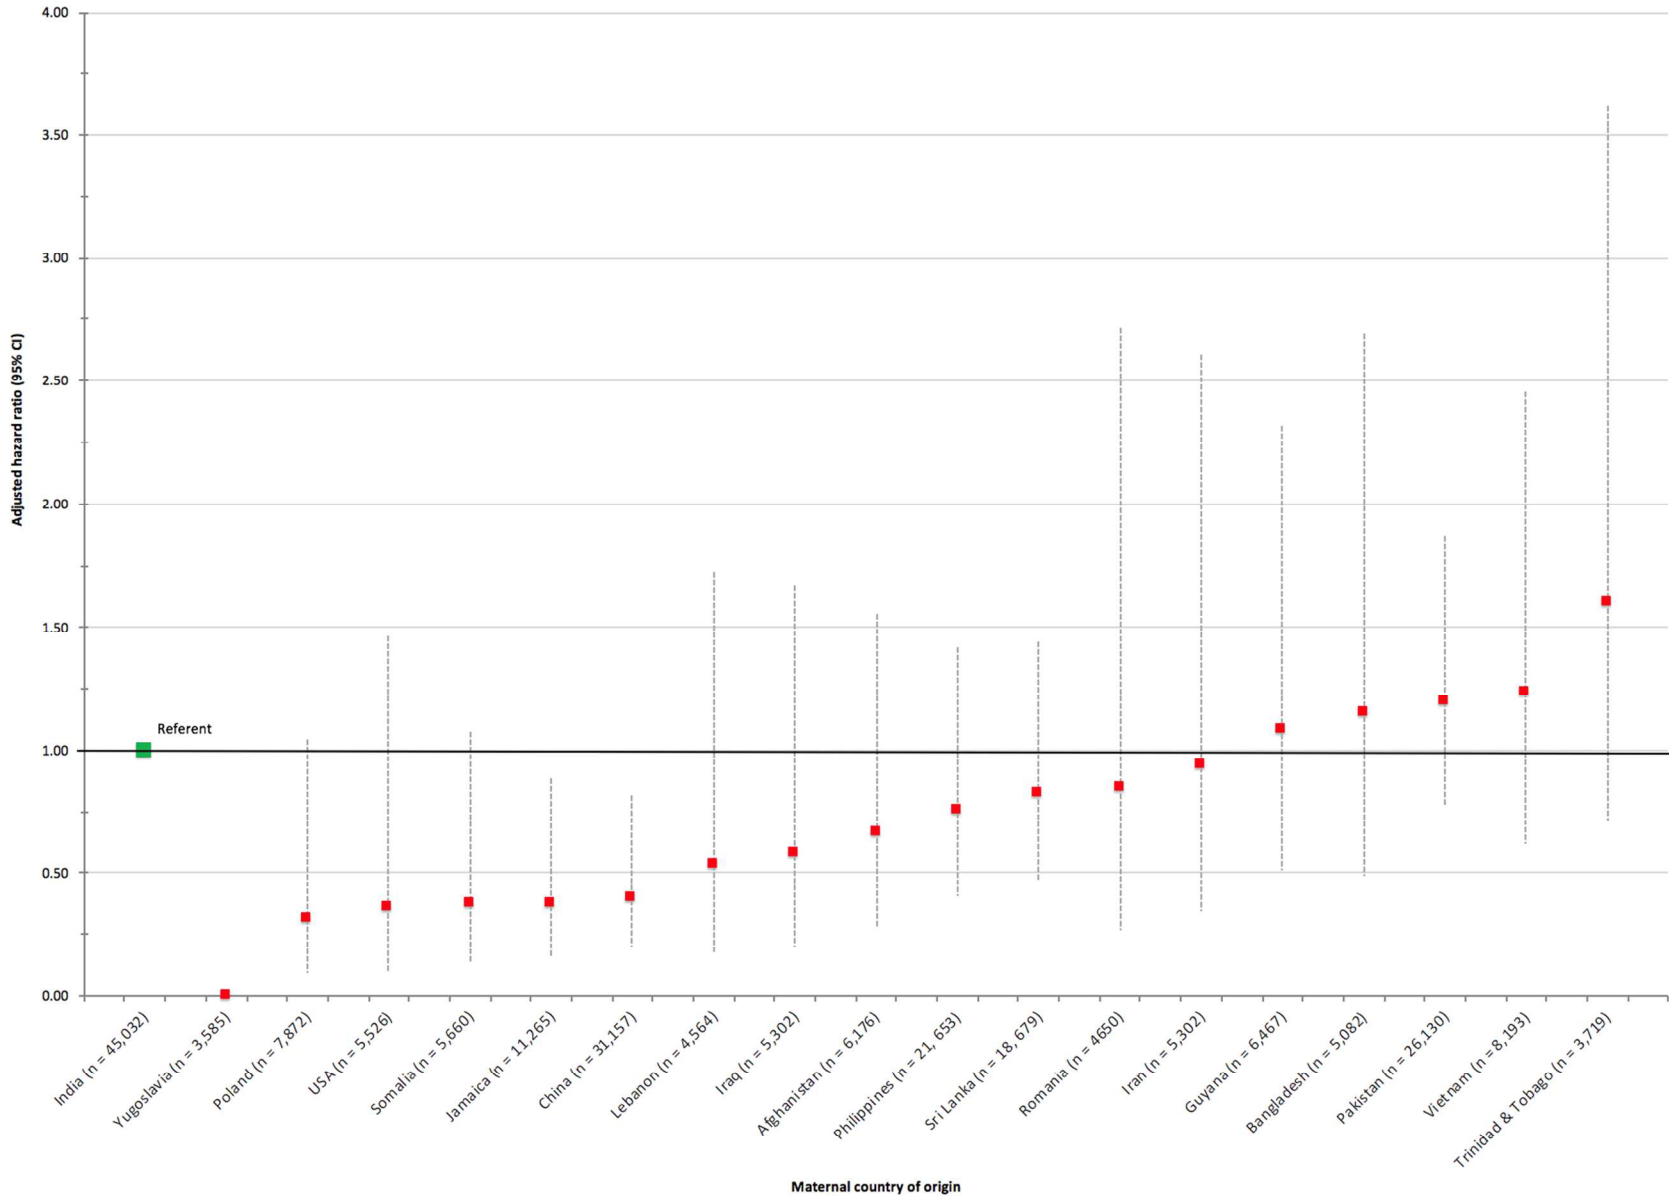



1 **Figure 2b. Risk of injury inflicted by others (assault or homicide) among immigrant women, comparing those from 19 different countries to**  
2 **women from India.** Hazard ratios are adjusted for maternal age, parity, duration of residence and refugee status.  
3  
4

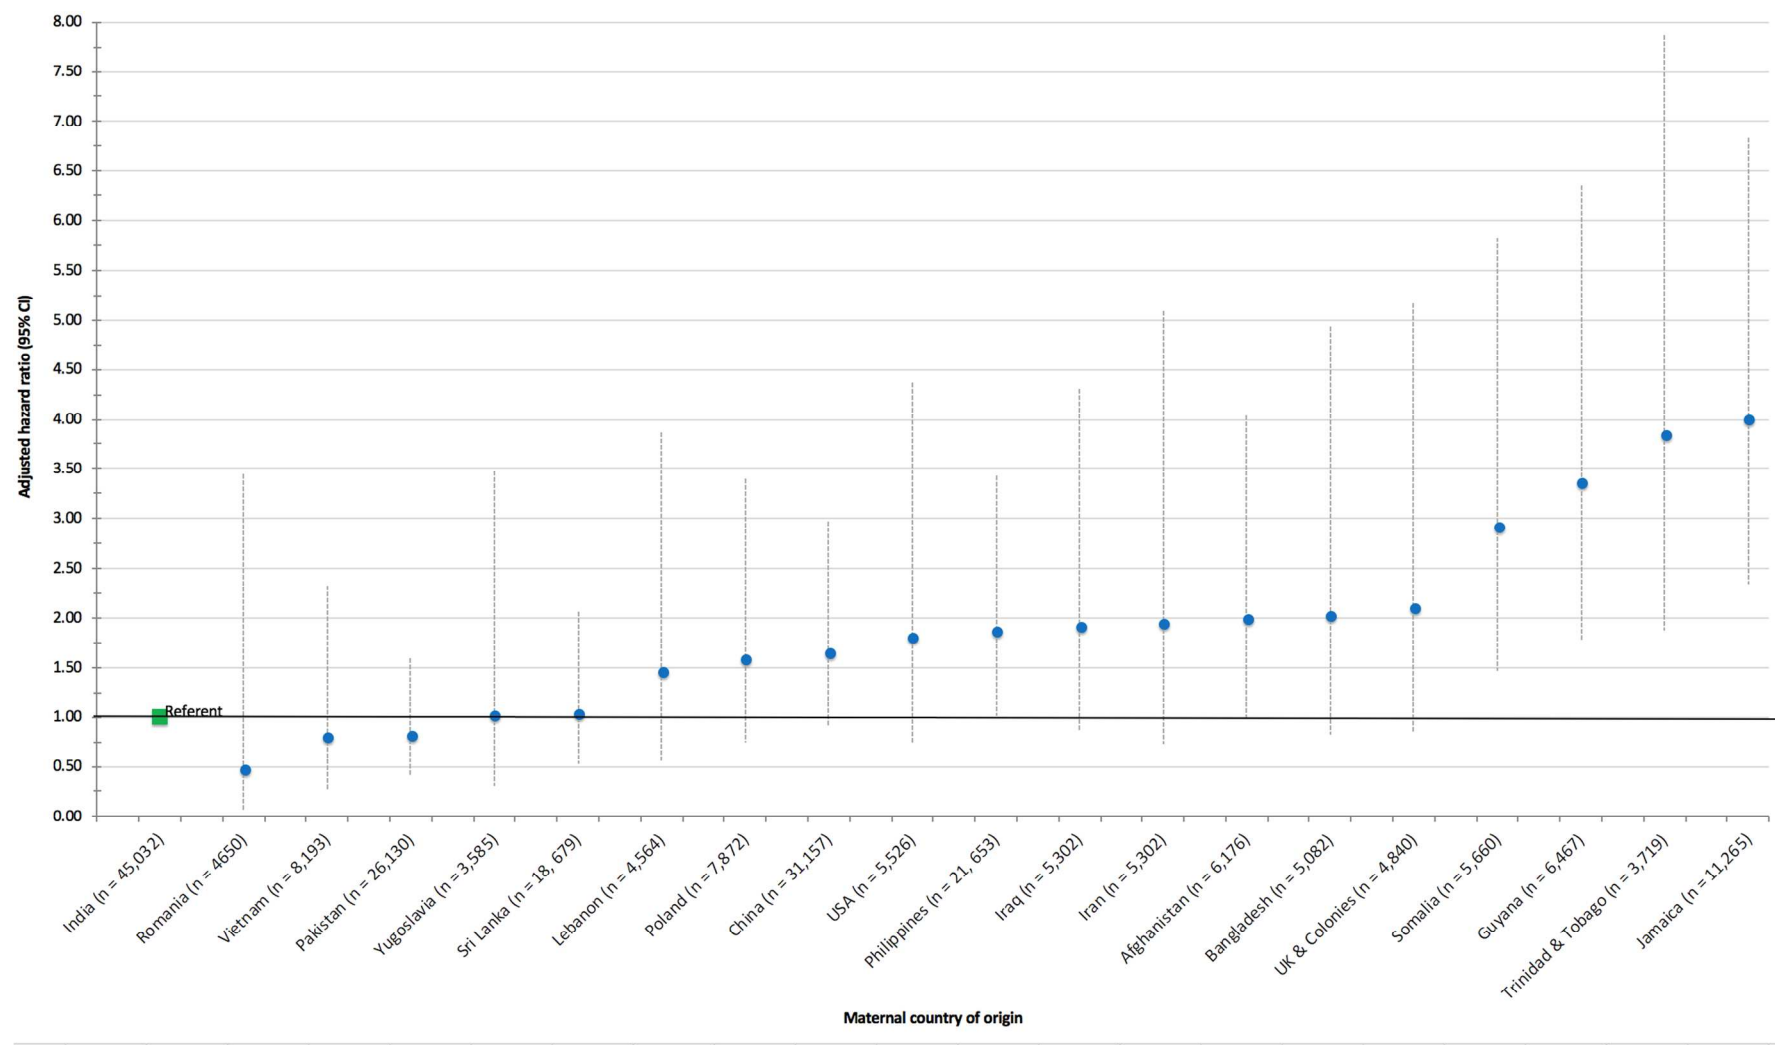

**References:**

1. Ray JG, Zipursky J, Park AL. Injury-related maternal mortality. *Am J Obstet Gynecol*. 2018.
2. Howard LM, Flach C, Mehay A, Sharp D, Tylee A. The prevalence of suicidal ideation identified by the Edinburgh Postnatal Depression Scale in postpartum women in primary care: findings from the RESPOND trial. *BMC Pregnancy Childbirth*. 2011;11:57.
3. Fuhr DC, Calvert C, Ronsmans C, Chandra PS, Sikander S, De Silva MJ, et al. Contribution of suicide and injuries to pregnancy-related mortality in low-income and middle-income countries: a systematic review and meta-analysis. *The lancet Psychiatry*. 2014;1(3):213-25.
4. Grigoriadis S, Wilton AS, Kurdyak PA, Rhodes AE, VonderPorten EH, Levitt A, et al. Perinatal suicide in Ontario, Canada: a 15-year population-based study. *CMAJ*. 2017;189(34):E1085-E92.
5. Devries KM, Kishor S, Johnson H, Stockl H, Bacchus LJ, Garcia-Moreno C, et al. Intimate partner violence during pregnancy: analysis of prevalence data from 19 countries. *Reprod Health Matters*. 2010;18(36):158-70.
6. Tinker SC, Reefhuis J, Dellinger AM, Jamieson DJ, National Birth Defects Prevention S. Epidemiology of maternal injuries during pregnancy in a population-based study, 1997-2005. *J Womens Health (Larchmt)*. 2010;19(12):2211-8.
7. Wiencrot A, Nannini A, Manning SE, Kennelly J. Neonatal outcomes and mental illness, substance abuse, and intentional injury during pregnancy. *Maternal and child health journal*. 2012;16(5):979-88.
8. Mendez-Figueroa H, Dahlke JD, Vrees RA, Rouse DJ. Trauma in pregnancy: an updated systematic review. *Am J Obstet Gynecol*. 2013;209(1):1-10.
9. Wallace ME, Hoyert D, Williams C, Mendola P. Pregnancy-associated homicide and suicide in 37 US states with enhanced pregnancy surveillance. *Am J Obstet Gynecol*. 2016;215(3):364 e1- e10.
10. Khalifeh H, Hunt IM, Appleby L, Howard LM. Suicide in perinatal and non-perinatal women in contact with psychiatric services: 15 year findings from a UK national inquiry. *The lancet Psychiatry*. 2016;3(3):233-42.
11. Palladino CL, Singh V, Campbell J, Flynn H, Gold KJ. Homicide and suicide during the perinatal period: findings from the National Violent Death Reporting System. *Obstet Gynecol*. 2011;118(5):1056-63.
12. Wang L, Hu W. Immigrant health, place effect and regional disparities in Canada. *Soc Sci Med*. 2013;98:8-17.
13. Vang ZM. Infant mortality among the Canadian-born offspring of immigrants and non-immigrants in Canada: a population-based study. *Popul Health Metr*. 2016;14:32.
14. Subedi RP, Rosenberg MW. Determinants of the variations in self-reported health status among recent and more established immigrants in Canada. *Soc Sci Med*. 2014;115:103-10.
15. Ray JG, Vermeulen MJ, Schull MJ, Singh G, Shah R, Redelmeier DA. Results of the Recent Immigrant Pregnancy and Perinatal Long-term Evaluation Study (RIPPLES). *CMAJ*. 2007;176(10):1419-26.
16. Vang ZM, Sigouin J, Flenon A, Gagnon A. Are immigrants healthier than native-born Canadians? A systematic review of the healthy immigrant effect in Canada. *Ethn Health*. 2017;22(3):209-41.

17. Falah-Hassani K, Shiri R, Vigod S, Dennis CL. Prevalence of postpartum depression among immigrant women: A systematic review and meta-analysis. *J Psychiatr Res.* 2015;70:67-82.
18. Spallek J, Reeske A, Norredam M, Nielsen SS, Lehnhardt J, Razum O. Suicide among immigrants in Europe--a systematic literature review. *Eur J Public Health.* 2015;25(1):63-71.
19. Ikram UZ, Mackenbach JP, Harding S, Rey G, Bhopal RS, Regidor E, et al. All-cause and cause-specific mortality of different migrant populations in Europe. *Eur J Epidemiol.* 2016;31(7):655-65.
20. Norredam M, Olsbjerg M, Petersen JH, Laursen B, Krasnik A. Are there differences in injury mortality among refugees and immigrants compared with native-born? *Inj Prev.* 2013;19(2):100-5.
21. Maaten S, Guttman, A., Kopp, A., Handa, M., & Jaakkimainen, L. Care of women during pregnancy and childbirth. In: Jaakkimainen LU, R., editor. *Primary Care in Ontario ICES Atlas.* Toronto: Institute for Clinical Evaluative Sciences; 2006.
22. Martin L, Hirdes JP, Morris JN, Montague P, Rabinowitz T, Fries BE. Validating the Mental Health Assessment Protocols (MHAPs) in the Resident Assessment Instrument Mental Health (RAI-MH). *J Psychiatr Ment Health Nurs.* 2009;16(7):646-53.
23. Hirdes JP, Smith TF, Rabinowitz T, Yamauchi K, Perez E, Telegdi NC, et al. The Resident Assessment Instrument-Mental Health (RAI-MH): inter-rater reliability and convergent validity. *J Behav Health Serv Res.* 2002;29(4):419-32.
24. Juurlink D, Preyra, C., Croxford, R., Chong, A., Austin, P., Tu, J., Laupacis, A. . Canadian Institute for Health Information Discharge Abstract Database: A Validation Study. Toronto: Institute for Clinical Evaluative Sciences; 2006.
25. Bethell J, Rhodes AE. Identifying deliberate self-harm in emergency department data. *Health reports.* 2009;20(2):35-42.
26. Gatov E, Kurdyak P, Sinyor M, Holder L, Schaffer A. Comparison of Vital Statistics Definitions of Suicide against a Coroner Reference Standard: A Population-Based Linkage Study. *Can J Psychiatry.* 2017;706743717737033.
27. The Johns Hopkins ACG® System. Chapter 1: Diagnosis-based Markers. 2014.
28. Oates M. Suicide: the leading cause of maternal death. *Br J Psychiatry.* 2003;183:279-81.
29. Gagnon AJ, Dougherty G, Wahoush O, Saucier JF, Dennis CL, Stanger E, et al. International migration to Canada: the post-birth health of mothers and infants by immigration class. *Soc Sci Med.* 2013;76(1):197-207.
30. Ganann R, Sword W, Black M, Carpio B. Influence of maternal birthplace on postpartum health and health services use. *Journal of immigrant and minority health / Center for Minority Public Health.* 2012;14(2):223-9.
31. Vigod S, Sultana A, Fung K, Hussain-Shamsy N, Dennis CL. A Population-Based Study of Postpartum Mental Health Service Use by Immigrant Women in Ontario, Canada. *Can J Psychiatry.* 2016;61(11):705-13.
32. Nannini A, Lazar J, Berg C, Barger M, Tomashek K, Cabral H, et al. Rates of hospital visits for assault during pregnancy and the year postpartum: timing matters. *Public Health Rep.* 2011;126(5):664-8.
33. Statistica. Rate of homicide in Canada and the United States from 2000 to 2016 2017 [Available from: <https://www.statista.com/statistics/526539/canada-us-homicide-rate/>].
34. Alisic E, Groot A, Snetselaar H, Stroeken T, van de Putte E. Children bereaved by fatal intimate partner violence: A population-based study into demographics, family characteristics and homicide exposure. *PLoS One.* 2017;12(10):e0183466.

- 1  
2  
3  
4  
5  
6  
7  
8  
9  
10  
11  
12  
13  
14  
15  
16  
17  
18  
19  
20  
21  
22  
23  
24  
25  
26  
27  
28  
29  
30  
31  
32  
33  
34  
35  
36  
37  
38  
39  
40  
41  
42  
43  
44  
45  
46  
47  
48  
49  
50  
51  
52  
53  
54  
55  
56  
57  
58  
59  
60
35. Heslehurst N, Brown H, Pemu A, Coleman H, Rankin J. Perinatal health outcomes and care among asylum seekers and refugees: a systematic review of systematic reviews. *BMC medicine*. 2018;16(1):89.
  36. Howard LM, Molyneaux E, Dennis CL, Rochat T, Stein A, Milgrom J. Non-psychotic mental disorders in the perinatal period. *Lancet*. 2014;384(9956):1775-88.
  37. Khalifeh H, Hunt IM, Appleby L, Howard LM. Suicide in perinatal and non-perinatal women in contact with psychiatric services: 15 year findings from a UK national inquiry. *The lancet Psychiatry*. 2016;3(3):233-42.
  38. Ryder AG, Yang J, Zhu X, Yao S, Yi J, Heine SJ, et al. The cultural shaping of depression: somatic symptoms in China, psychological symptoms in North America? *J Abnorm Psychol*. 2008;117(2):300-13.
  39. Daoud N, O'Campo P, Urquia ML, Heaman M. Neighbourhood context and abuse among immigrant and non-immigrant women in Canada: findings from the Maternity Experiences Survey. *Int J Public Health*. 2012;57(4):679-89.
  40. Dennis CL, Fung K, Grigoriadis S, Robinson GE, Romans S, Ross L. Traditional postpartum practices and rituals: a qualitative systematic review. *Womens Health (Lond Engl)*. 2007;3(4):487-502.
  41. Grigoriadis S, Erlick Robinson G, Fung K, Ross LE, Chee CY, Dennis CL, et al. Traditional postpartum practices and rituals: clinical implications. *Can J Psychiatry*. 2009;54(12):834-40.
  42. Collins CH, Zimmerman C, Howard LM. Refugee, asylum seeker, immigrant women and postnatal depression: rates and risk factors. *Arch Womens Ment Health*. 2011;14(1):3-11.
  43. Halbreich U, Karkun S. Cross-cultural and social diversity of prevalence of postpartum depression and depressive symptoms. *J Affect Disord*. 2006;91(2-3):97-111.
  44. Vigod SN, Bagadia AJ, Hussain-Shamsy N, Fung K, Sultana A, Dennis CE. Postpartum mental health of immigrant mothers by region of origin, time since immigration, and refugee status: a population-based study. *Arch Womens Ment Health*. 2017;20(3):439-47.
  45. Edge D. Ethnicity, psychosocial risk, and perinatal depression--a comparative study among inner-city women in the United Kingdom. *J Psychosom Res*. 2007;63(3):291-5.
  46. Edge D, Rogers A. Dealing with it: Black Caribbean women's response to adversity and psychological distress associated with pregnancy, childbirth, and early motherhood. *Soc Sci Med*. 2005;61(1):15-25.
  47. Cherniak D, Grant L, Mason R, Moore B, Pellizzari R, Obstetricians IPVWGSo, et al. Intimate partner violence consensus statement. *J Obstet Gynaecol Can*. 2005;27(4):365-418.
  48. Hyman I, Forte T, Du Mont J, Romans S, Cohen MM. Help-seeking behavior for intimate partner violence among racial minority women in Canada. *Womens Health Issues*. 2009;19(2):101-8.
  49. Kingston D, Heaman M, Urquia M, O'Campo P, Janssen P, Thiessen K, et al. Correlates of Abuse Around the Time of Pregnancy: Results from a National Survey of Canadian Women. *Maternal and child health journal*. 2016;20(4):778-89.
  50. Zhao Y, Kane I, Wang J, Shen B, Luo J, Shi S. Combined use of the postpartum depression screening scale (PDSS) and Edinburgh postnatal depression scale (EPDS) to identify antenatal depression among Chinese pregnant women with obstetric complications. *Psychiatry Res*. 2015;226(1):113-9.

**Table S1. Risk of self-inflicted injury and injury inflicted by others by maternal country of origin for the 20 countries contributing the most births to the cohort. Shown are crude relative risks (RR), comparing women from each country to non-immigrant women.**

| Maternal Country of Origin    | Self-inflicted injury |                          |                   | Injury inflicted by others |                          |                   |
|-------------------------------|-----------------------|--------------------------|-------------------|----------------------------|--------------------------|-------------------|
|                               | No. with outcome      | Rate per 1000 deliveries | Crude RR (95% CI) | No. with outcome           | Rate per 1000 deliveries | Crude RR (95% CI) |
| Non-immigrant (N = 942,502)   | 240                   | 0.73                     | 1.00 (referent)   | 360                        | 1.10                     | 1.00 (referent)   |
| India (N = 45,032)            | 45                    | 1.00                     | 0.79 (0.58-1.06)  | 26                         | 0.58                     | 0.20 (0.13-0.30)  |
| China (N = 31,157)            | 9                     | 0.29                     | 0.23 (0.12-0.44)  | 21                         | 0.67                     | 0.23 (0.15-0.36)  |
| Pakistan (N = 26,130)         | 36                    | 1.38                     | 1.08 (0.78-1.51)  | 14                         | 0.54                     | 0.19 (0.11-0.31)  |
| Philippines (N = 21,653)      | 13                    | 0.60                     | 0.27 (0.47-0.82)  | 20                         | 0.92                     | 0.32 (0.21-0.50)  |
| Sri Lanka (N = 18,679)        | 17                    | 0.91                     | 0.72 (0.44-1.15)  | 13                         | 0.70                     | 0.24 (0.14-0.42)  |
| Jamaica (N = 11,265)          | 6                     | 0.53                     | 0.42 (0.19-0.93)  | 43                         | 3.82                     | 1.33 (0.98-1.79)  |
| Vietnam (N = 8,193)           | 10                    | 1.22                     | 0.96 (0.52-1.79)  | NR                         | -                        | -                 |
| Poland (N = 7,872)            | NR                    | -                        | -                 | 10                         | 1.27                     | 0.44 (0.24-0.82)  |
| Guyana (N = 6,467)            | 8                     | 1.24                     | 0.97 (0.49-1.95)  | 16                         | 2.47                     | 0.86 (0.53-1.41)  |
| Afghanistan (N = 6,176)       | 7                     | 1.13                     | 0.89 (0.42-1.87)  | 13                         | 2.10                     | 0.73 (0.42-1.26)  |
| Somalia (N = 5,660)           | NR                    | -                        | -                 | 20                         | 3.53                     | 1.23 (0.78-1.95)  |
| United States (N = 5,526)     | NR                    | -                        | -                 | 6                          | 1.09                     | 0.38 (0.17-0.84)  |
| Iran (N = 5,302)              | NR                    | -                        | -                 | NR                         | -                        | -                 |
| Iraq (N = 5,227)              | NR                    | -                        | -                 | 8                          | 1.53                     | 0.53 (0.27-1.07)  |
| Bangladesh (N = 5,082)        | 6                     | 1.18                     | 0.93 (0.42-2.07)  | 6                          | 1.18                     | 0.41 (0.18-0.91)  |
| UK and Colonies (N = 4,840)   | 9                     | 1.86                     | 1.46 (0.76-2.82)  | 14                         | 2.89                     | 0.43 (0.19-0.96)  |
| Romania (N = 4650)            | NR                    | -                        | -                 | NR                         | -                        | -                 |
| Lebanon (N = 4,564)           | NR                    | -                        | -                 | NR                         | -                        | -                 |
| Trinidad & Tobago (N = 3,719) | 7                     | 1.88                     | 1.48 (0.70-3.11)  | 11                         | 2.96                     | 1.03 (0.57-1.86)  |
| Yugoslavia (N = 3,585)        | 0                     | 0                        | 0                 | NR                         | -                        | -                 |
| Other (N = 96,500)            | 44                    | 0.46                     | 0.36 (0.27-0.48)  | 109                        | 1.13                     | 0.39 (0.32-0.48)  |

NR (Not reportable) due to cell sizes under 6.
